## SUPPORTING INFORMATION FILE 2

**Table S2. Ratio of mean substitution rates (dN/dS) for each HLA-B\*5701 subject.**

| Classification | Subject | All <sup>1</sup> | Internal <sup>2</sup> | Backbone Paths <sup>3</sup> | External <sup>4</sup> |
|----------------|---------|------------------|-----------------------|-----------------------------|-----------------------|
| HRPs           | P1      | 0.46             | 0.42                  | 0.76                        | 0.48                  |
|                | P2      | 0.09             | 0.15                  | 1.37                        | 0.05                  |
|                | P3      | 0.29             | 0.36                  | 0.54                        | 0.16                  |
| LRPs           | P4      | 0.2              | 0.21                  | 0.24                        | 0.18                  |
|                | P5      | 0.2              | 0.26                  | 1.56                        | 0.15                  |
|                | P6      | 0.07             | 0.09                  | 0.13                        | 0.07                  |

<sup>1</sup> HIV-1 dN and dS substitution rates were estimated for each data set by including all branches of the viral genealogy.

<sup>2</sup> dN and dS rate estimates for internal branches only.

<sup>3</sup> Average dN and dS estimated along each possible backbone path.

<sup>4</sup> dN and dS rate estimates for external branches only.
