# Supplementary material for: Baseline CD4+ T Cell Counts Correlates with HIV-1 Synonymous Rate in HLA-B*5701 Subjects with Different Risk of Disease Progression
Source: PLOS journal article supplement (doi:10.1371/journal.pcbi.1003830), 2014-09-04
Supplement: S3 (10.1371/journal.pcbi.1003830.s003) [file journal.pcbi.1003830.s003]

## SUPPORTING INFORMATION FILE 1

**Table S1. Linear regression slopes of nonsynonymous (dN) vs. synonymous (dS) substitution rates estimated for all HLA-B\*5701 subjects.**

|                      | All <sup>1</sup> | Internal <sup>2</sup> | Backbone Paths <sup>3</sup> | External <sup>4</sup> |
|----------------------|------------------|-----------------------|-----------------------------|-----------------------|
| <b>Slope</b>         | 0.14             | 0.20                  | 0.78                        | 0.21                  |
| <b>R<sup>2</sup></b> | 0.17             | 0.38                  | 0.39                        | 0.21                  |
| <b>p-value</b>       | 0.21             | 0.10                  | 0.09                        | 0.18                  |

<sup>1</sup> HIV-1 dN and dS were estimated for each data set by including all branches of the viral genealogy.

<sup>2</sup> dN and dS estimates for internal branches only.

<sup>3</sup> Average dN and dS estimated along each possible backbone path.

<sup>4</sup> dN and dS rate estimates for external branches only.
